# Supplementary material
Source: PubMed Central journal article supplement (PMC5651204)
Supplement: NIHMS870603-supplement-1.pdf [file NIHMS870603-supplement-1.pdf]

## SUPPLEMENTARY FIGURE LEGENDS

**Supplementary Figure 1: Foxd1-stroma specific knockdown of *Klf15* in *Foxd1-Cre Klf15<sup>fl/fl</sup>* mice was confirmed.** (A) Confirmation of recombination by PCR of genomic DNA from total kidney cortex. (B) Primary fibroblasts were isolated from *Foxd1-Cre Klf15<sup>fl/fl</sup>* and *Foxd1-Cre Klf15<sup>+/+</sup>* mice and RNA was extracted for RT-PCR was performed for *Klf15* mRNA expression (n=6, \*p<0.05, Mann-Whitney test). (C) Immunofluorescence staining for KLF15 and  $\alpha$ SMA was performed in 12-week old *Foxd1-Cre Klf15<sup>fl/fl</sup>* and *Foxd1-Cre Klf15<sup>+/+</sup>* mice. Representative images from four mice in each group are shown in the left panel (X 20). Arrows show colocalization of KLF15 and  $\alpha$ SMA in medium-sized artery. (D) Primary fibroblasts were isolated from *Foxd1-Cre Klf15<sup>fl/fl</sup>* and *Foxd1-Cre Klf15<sup>+/+</sup>* mice and RNA was extracted for RT-PCR was performed for *Ctgf*, *Col1 $\alpha$ 1*, *Fibronectin*, and *Vimentin* mRNA expression (n=6, \*p<0.05, Mann-Whitney test).

**Supplementary Figure 2: Increased in TGF $\beta$  signaling in *Foxd1-Cre Klf15<sup>fl/fl</sup>* mice as compared to *Foxd1-Cre Klf15<sup>+/+</sup>* mice.** Age-matched 12-week-old *Foxd1-Cre Klf15<sup>fl/fl</sup>* and *Foxd1-Cre Klf15<sup>+/+</sup>* mice were concurrently treated with UUO or sham for 7 days. (A) RNA was extracted from total kidney cortex and RT-PCR was performed for *Ctgf* expression from 12-week-old *Foxd1-Cre Klf15<sup>fl/fl</sup>* and *Foxd1-Cre Klf15<sup>+/+</sup>* mice treated with sham or UUO for 7 days. (n=6, \*p<0.05, \*\*\*p<0.001, Kruskal-Wallis test with Dunn's post-test). (B-D) Western blot was also performed on total kidney cortex for phospho-Smad2/3, total-Smad2/3, and GAPDH. Representative blots from three independent experiments are shown. Densitometry analysis was performed to quantify protein expression. (n=3, \*p<0.05, \*\*p<0.01, \*\*\*p<0.001, Kruskal-Wallis test with Dunn's post-test).

**Supplementary Figure 3: Baseline measurements in Angiotensin II (AngII) treated mice.** Age matched 12-week-old *Foxd1-Cre Klf15<sup>+/+</sup>* and *Foxd1-Cre Klf15<sup>fl/fl</sup>* mice were treated with subcutaneous continuous infusion of AngII or saline for 6 weeks. Subsequently (A) heart weight (g) and (B) kidney weight (g) with respect to body weight (g) were measured. (C) Systolic blood pressure was determined using tail-cuff manometry. (n=6, \*p<0.05, \*\*p<0.01, \*\*\*p<0.001, Kruskal-Wallis test with Dunn's post-test).

**Supplementary Figure 4: Loss of *Klf15* in MEFs activates Wnt/ $\beta$ -catenin signaling.** *Klf15* knockdown (*Klf15-shRNA*) in MEFs was performed using lentiviral shRNAmir system. *EV-shRNA* serves as the empty vector control. (A) Western blot was performed for KLF15 in *Klf15-shRNA* and *EV-shRNA* MEFs. Representative blots from three independent experiments are shown. (B) Wnt1 ligand was generated in the supernatant in HEK293 cells overexpressing Wnt1. Western blot was performed in supernatant in pNL-CMVWnt1IRESEGFP-WPRE $\Delta$ U3 and pNL-CMVIRESEGFP-WPRE $\Delta$ U3 in HEK293 cells. Subsequently, *Klf15-shRNA* and *EV-shRNA* MEFs were grown to 80% confluency and treated with Wnt1 ligand at 0.25, 0.5, 1.0  $\mu$ g/ml for 48 hours. (C) Western blot for phospho- $\beta$ -catenin, total- $\beta$ -catenin, c-Myc, and GAPDH were performed. Representative blots from three independent experiments are shown. (Right panel) Densitometry analysis was performed to quantify protein expression. (n=3, \*p<0.05 to dose-matched *EV-shRNA*, two-way ANOVA with Tukey's post-test).

**Supplementary Table 1: Promoter analysis of KLF15 binding sites**

| Name                                                                | P-value | Z-score | Genes                                                                                                                                                                                                                                                                                                                                                             |
|---------------------------------------------------------------------|---------|---------|-------------------------------------------------------------------------------------------------------------------------------------------------------------------------------------------------------------------------------------------------------------------------------------------------------------------------------------------------------------------|
| Wnt Signaling Pathway Netpath(Homo sapiens)                         | 0.002   | -2.032  | GSK3B; TCF7L2; CTBP1; LEF1; NFATC2; CSNK1D; TSC1; ARRB2; MAPK9; CDK6; AKT1; CTNNB1; PPARG; TCF4                                                                                                                                                                                                                                                                   |
| PodNet: protein-protein interactions in the podocyte (Mus musculus) | 0.006   | -2.159  | DDR1; LDB1; ILK; ARRB2; LAMC1; RBPJ; CMIP; PPP3CA; CAPZB; AKT1; STRA13; PRKACA; SPTAN1; RALGPS1; PAX2; ENAH; INF2; PARD3; KCNMA1; BIRC5; PICK1; LMX1B; PLA2R1; DBN1; CAMK2B; CD151; SHC1; PXN; TENC1; CBL; CXXC5; APH1B; CSK; FYN; MYH10; FKTN; SMAD2; RAB4A; TGFB2; EGLN2; SMURF1; NFATC3; NR2F2; BAIAP2; SMAD7; CXCL12; NPHS1; WT1; CTNNB1; BCAR1; LIMS2; LIMS1 |
| Wnt Signaling Pathway NetPath (Mus musculus)                        | 0.038   | -1.855  | CAMK2B;GSK3B;CTBP1;FZD4;CTNNBIP1;LEF1;CSNK1D;ARRB2;SENP2;PAX2;MAPK9;SALL1;AKT1;CTNNB1;PIN1;TCF4;MARK2;ANKRD6                                                                                                                                                                                                                                                      |
| Deactivation of the beta-catenin transactivating complex            | 0.031   | -2.118  | TCF7L2; CTBP1; CTNNBIP1; LEF1; TCF7; AKT1; CTNNB1; MEN1                                                                                                                                                                                                                                                                                                           |
| Repression of WNT target genes                                      | 0.012   | -1.975  | TCF7L2; CTBP1; LEF1; TCF7; CTNNB1; AES                                                                                                                                                                                                                                                                                                                            |

WikiPathways 2016 gene-set library

\* less than overlap of 5 genes

p < 0.05 (Fischer exact test)

Z-score- assess deviation from the expected rank

**Supplementary Table 2: Primer Sequences for Real-Time PCR**

| Gene                     | Forward primer              | Reverse primer           |
|--------------------------|-----------------------------|--------------------------|
| Mouse <i>Klf15</i>       | AGAGCAGCCACCTCAAGGCCCA      | TCACACCCGAGTGAGATCGCCGGT |
| Mouse <i>Col1a1</i>      | GCTCTTTTTAGATACTGTGGTGAGGAA | GTTTCCACGTCTCACCATTG     |
| Mouse <i>Vimentin</i>    | GGATCAGCTCACCAACGACA        | GGTCAAGACGTGCCAGAGAA     |
| Mouse <i>Fibronectin</i> | ATGGTACAGCTGATCCTGCC        | GCCCTGGTTTGTACCTGCTA     |
| Mouse <i>c-Myc</i>       | GAGCTCCTCGAGCTGTTTGA        | GCATCGTCGTGGCTGTCT       |
| Mouse <i>Ctgf</i>        | CTGACCTGGAGGAAAACATTA       | TTAGCCCTGTATGTCTTCACAC   |
